# Supplementary material for: Two-Photon Laser Ablation and In Vivo Wide-Field Imaging of Inferior Olive Neurons Revealed the Recovery of Olivocerebellar Circuits in Zebrafish
Source: MDPI journal article supplement (doi:10.3390/ijerph18168357), 2021-08-06
Supplement: s1 [file s1]

| Approach         | Advantages                                                                     |
|------------------|--------------------------------------------------------------------------------|
| Cerebellectomy   | Relatively simple procedure, cells are physically removed                      |
| Drug application | Chemical targeting is possible, easily applicable to deep brain                |
| Laser ablation   | High spatiotemporal resolution, less invasive, easily applicable to deep brain |

**Table S1** Approaches for cerebellar lesion and their advantages
